# Supplementary material for: EVA Films Loaded with Layered Double Hydroxide (LDH) Modified with Methacrylic Anion: Effect of the Nanohybrid Filler on the Photodegradation Phenomena
Source: MDPI journal article supplement (doi:10.3390/polym13152525), 2021-07-30
Supplement: s1 [file s1]

**EVA films loaded with Layered Double Hydroxide (LDH) modified with methacrylic anion:  
effect of the nanohybrid filler on the photodegradation phenomena**

Giuliana Gorrasi<sup>1</sup>, Gianluca Viscusi<sup>1</sup>, Giusy Curcuruto<sup>2</sup>, Maria Cantarella<sup>3</sup>, Alessandro Mauro<sup>3</sup>,  
Paola Bernardo<sup>4</sup>, Gabriele Clarizia<sup>4</sup>, Andrea Scamporrino<sup>2\*</sup>, and Sabrina Carroccio<sup>2</sup>

<sup>1</sup>Dipartimento di Ingegneria Industriale, Università degli studi di Salerno, Via Giovanni Paolo II, 132, 84084 Fisciano (SA), Italy.

<sup>2</sup>Consiglio Nazionale delle Ricerche, CNR-IPCB s.s Catania, Via P. Gaifami 18, 95126, Italy

<sup>3</sup>Consiglio Nazionale delle Ricerche, CNR-IMM s.s Catania (Università), Via P. Gaifami 18, 95126, Italy

<sup>4</sup>Consiglio Nazionale delle Ricerche, CNR-ITM via P. Bucci 17/c, 87036 Rende, Italy

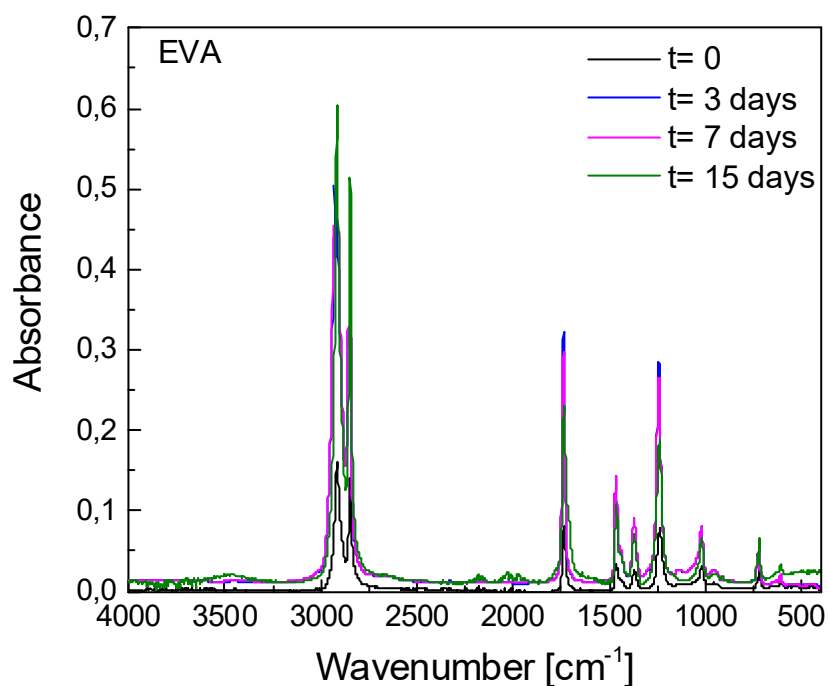

**Figure S.I. 1: ATR infrared spectrum of EVA at different exposure time.**

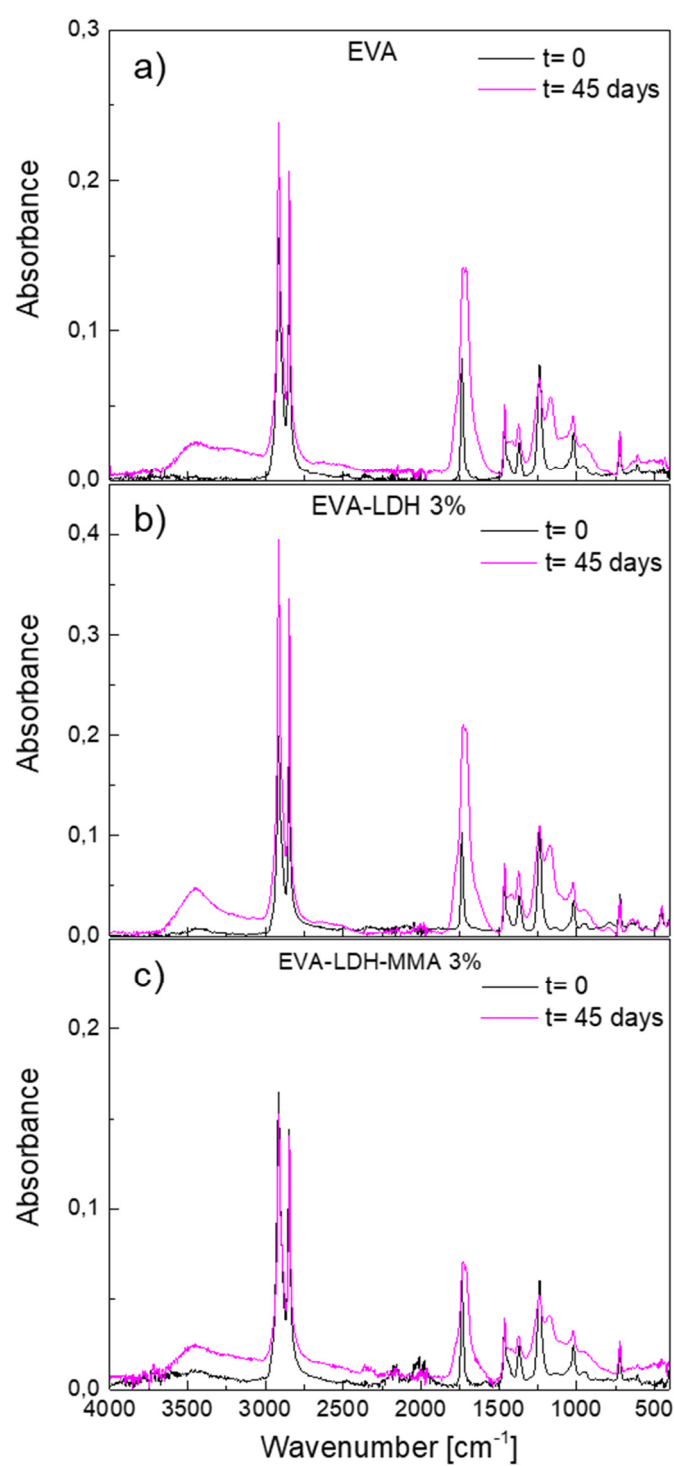

**Figure S.I. 2:** ATR infrared spectra of EVA (a), EVA-LDH 3% (b) and EVA-LDH-MMA 3% (c) as prepared, and after 45 days of exposure time.

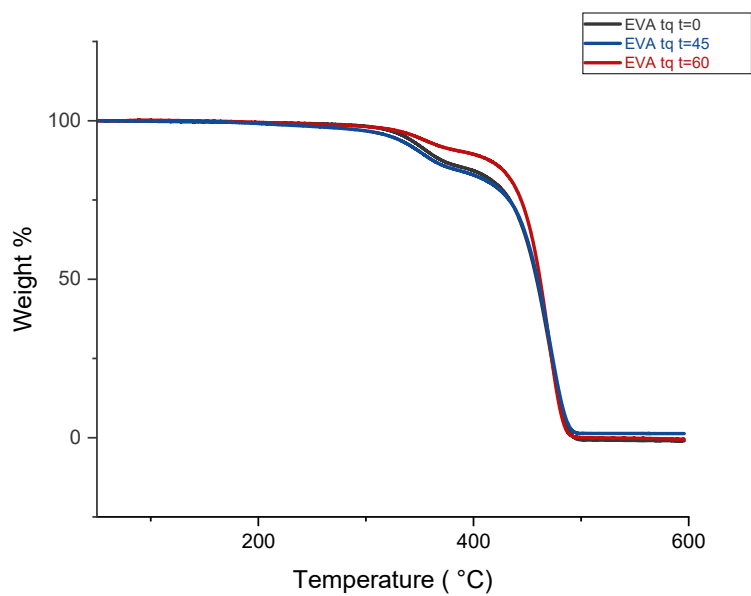

**Figure S.I. 3 TGA profiles of EVA TQ as prepared, and after 45 and 60 days of exposure time.**

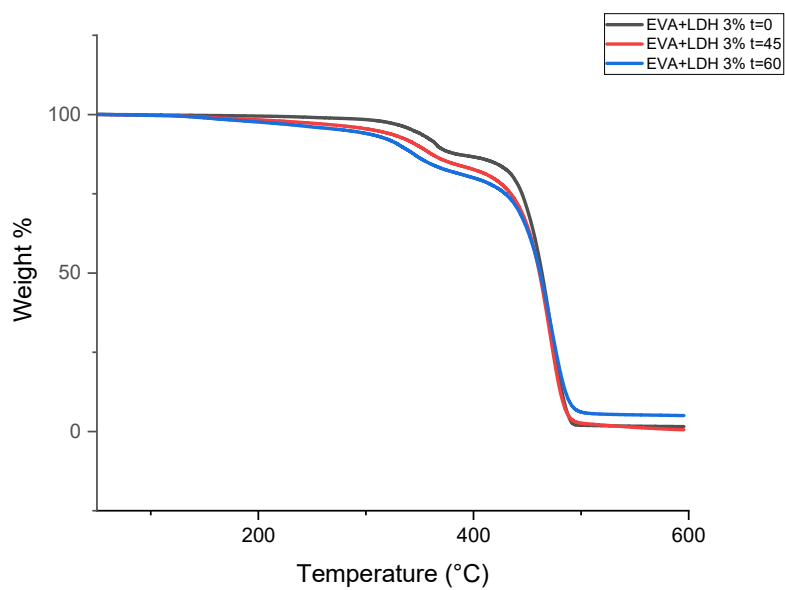

**Figure S.I.:4 TGA profiles of EVA + LDH 3% as prepared, and after 45 and 60 days of exposure time.**

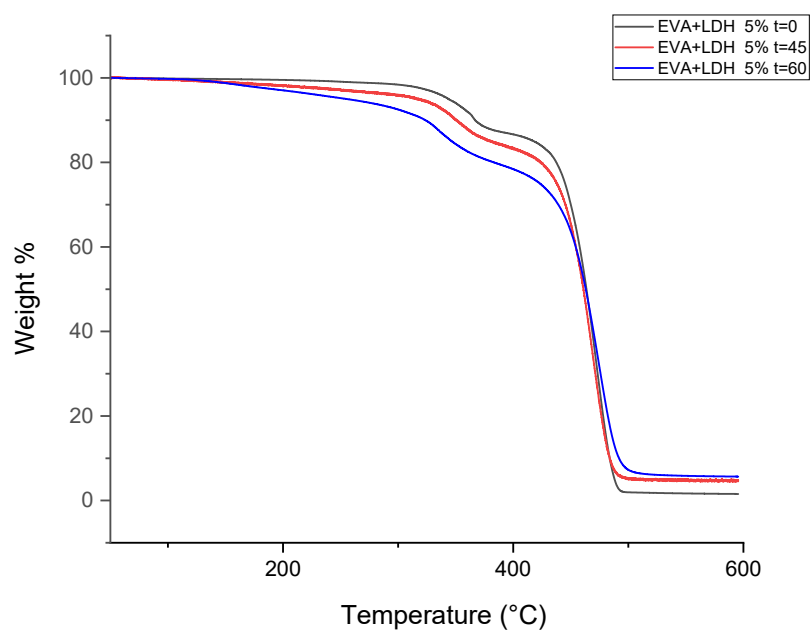

**Figure S.I.:5** TGA profiles of EVA + LDH 5% as prepared, and after 45 and 60 days of exposure time.

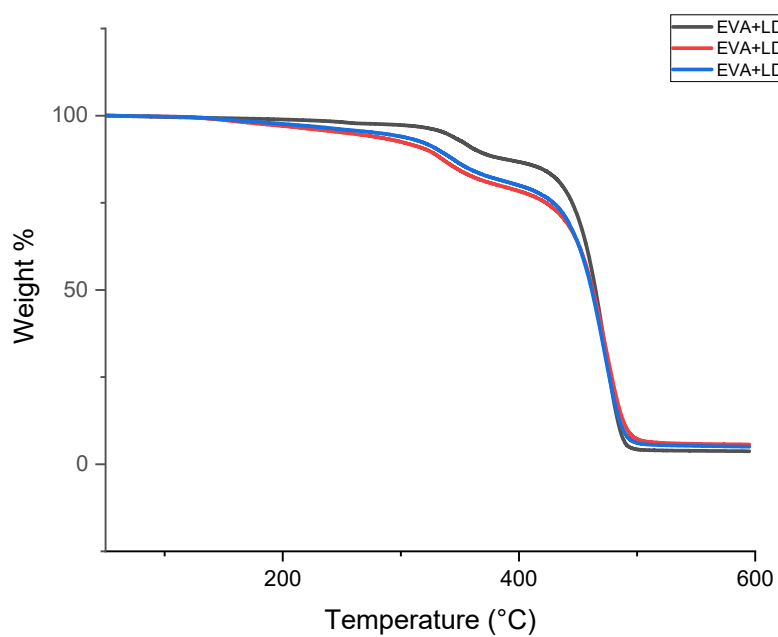

**Figure S.I.:6** TGA profiles of EVA + LDH 10% as prepared, and after 45 and 60 days of exposure time.

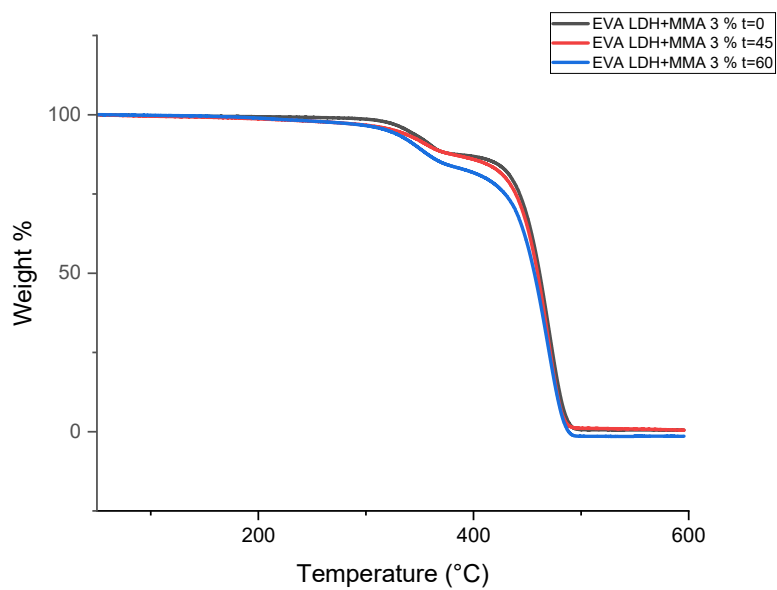

**Figure S.I.:7** TGA profiles of EVA + LDH +MMA 3% as prepared, and after 45 and 60 days of exposure time.

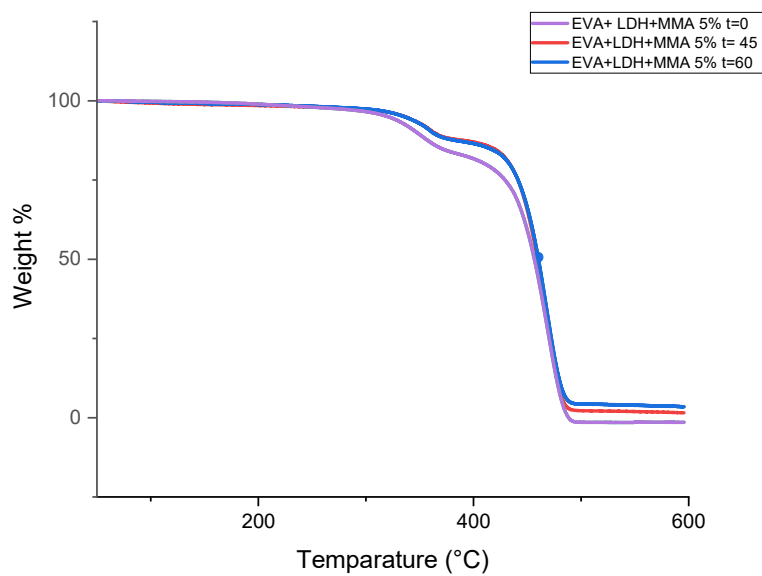

**Figure S.I.:8** TGA profiles of EVA + LDH +MMA 5% as prepared, and after 45 and 60 days of exposure time.

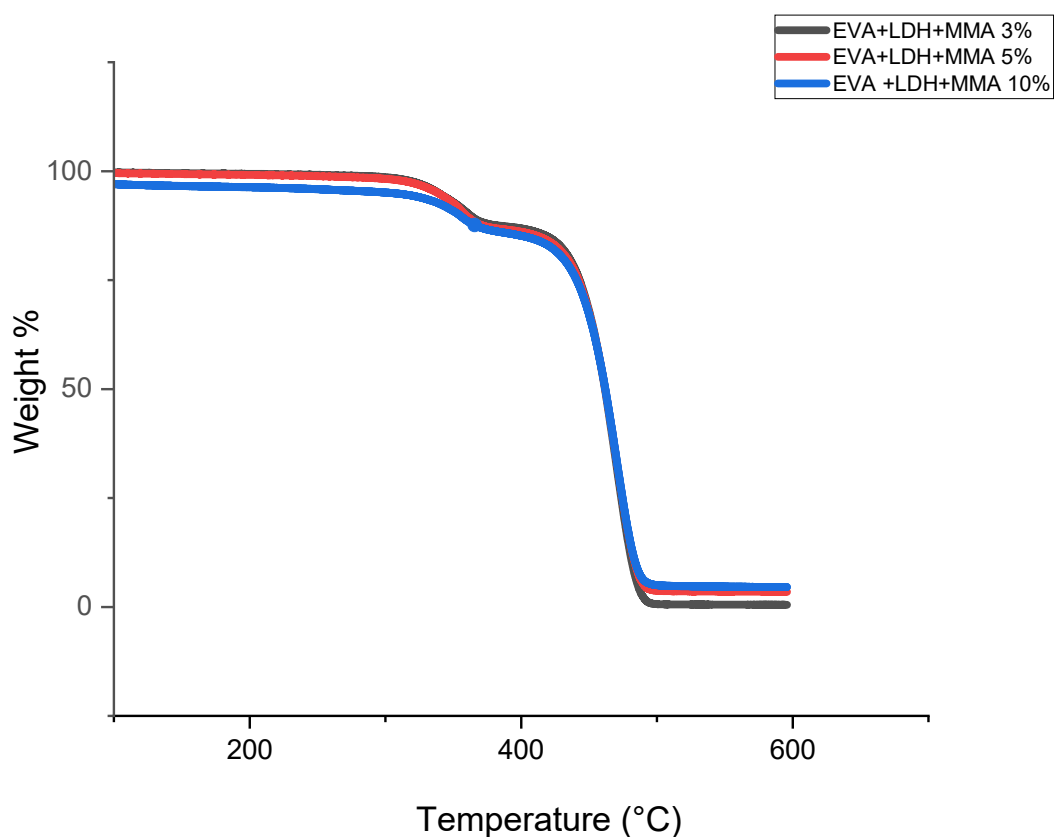

**Figure S.I.:9 TGA profiles of EVA + LDH +MMA 3, 5 and 10%**

TGA measurements on EVA+LDH+MMA 3%, EVA+LDH+MMA 10%, EVA+LDH 3% and EVA+LDH 10% were performed in presence of N<sub>2</sub> using a thermogravimetric apparatus (TA Instruments Q500) under air flow (60 mL min<sup>-1</sup>) with a heating rate of 10 °C min<sup>-1</sup> from 50 to 600 °C. The obtained results were summarized in Tables as a follow.

Table S.I. 1: Onset temperature of degradation, temperature at maximum rate of decomposition and residual masses of EVA+LDH+MMA 3% at 0, 45 and 60 days of exposure.

| <b>Sample</b>              | $T_{95} (^{\circ}\text{C})^a$ | $T_{peak} (^{\circ}\text{C})^b$ | <i>Residue at<br/><math>T=600^{\circ}\text{C}</math></i> |
|----------------------------|-------------------------------|---------------------------------|----------------------------------------------------------|
| <i>Eva+LDH+MMA 3% t=0</i>  | 323                           | 471                             | 0.8                                                      |
| <i>Eva+LDH+MMA 3% t=45</i> | 318                           | 470                             | 0.5                                                      |
| <i>Eva+LDH+MMA 3% t=60</i> | 316                           | 469                             | 0.1                                                      |

(a) Temperature at wt -5% of weight loss

(b) Temperature at the maximum derivate of weight loss

(c) % of residue at 600°C

Table S.I. 2: Onset temperature of degradation, temperature at maximum rate of decomposition and residual masses of EVA+LDH+MMA 10% at 0, 45 and 60 days of exposure.

| <b>Sample</b>               | $T_{95} (^{\circ}\text{C})^a$ | $T_{peak} (^{\circ}\text{C})^b$ | Residue at<br>$T=600^{\circ}\text{C}$ |
|-----------------------------|-------------------------------|---------------------------------|---------------------------------------|
| <i>Eva+LDH+MMA 10% t=0</i>  | 336                           | 470                             | 1.6                                   |
| <i>Eva+LDH+MMA 10% t=45</i> | 328                           | 467                             | 1.8                                   |
| <i>Eva+LDH+MMA 10% t=60</i> | 325                           | 467                             | 2.3                                   |

- (a) Temperature at wt -5% of weight loss  
(b) Temperature at the maximum derivate of weight loss  
(c) % of residue at 600°C

Table S.I.: 3 Onset temperature of degradation, temperature at maximum rate of decomposition and residual masses of EVA+LDH 3% at 0, 45 and 60 days of exposure.

| <b>Sample</b>          | $T_{95} (^{\circ}\text{C})^a$ | $T_{peak} (^{\circ}\text{C})^b$ | Residue at<br>$T=600^{\circ}\text{C}$ |
|------------------------|-------------------------------|---------------------------------|---------------------------------------|
| <i>Eva+LDH 3% t=0</i>  | 305                           | 473                             | 0.8                                   |
| <i>Eva+LDH 3% t=45</i> | 299                           | 471                             | 0.5                                   |
| <i>Eva+LDH3% t=60</i>  | 275                           | 467                             | 2.0                                   |

- (a) Temperature at wt -5% of weight loss  
(b) Temperature at the maximum derivate of weight loss  
(c) % of residue at 600°C

Table S.I.: 4 Onset temperature of degradation, temperature at maximum rate of decomposition and residual masses of EVA+LDH 10% at 0, 45 and 60 days of exposure.

| <b>Sample</b>           | $T_{95} (^{\circ}\text{C})^a$ | $T_{peak} (^{\circ}\text{C})^b$ | Residue at<br>$T=600^{\circ}\text{C}$ |
|-------------------------|-------------------------------|---------------------------------|---------------------------------------|
| <i>Eva+LDH 10% t=0</i>  | 338                           | 473                             | 3.7                                   |
| <i>Eva+LDH 10% t=45</i> | 334                           | 474                             | 5.6                                   |
| <i>Eva+LDH10% t=60</i>  | 325                           | 472                             | 5.1                                   |

- (a) Temperature at wt -5% of weight loss  
(b) Temperature at the maximum derivate of weight loss  
(c) % of residue at 600°C

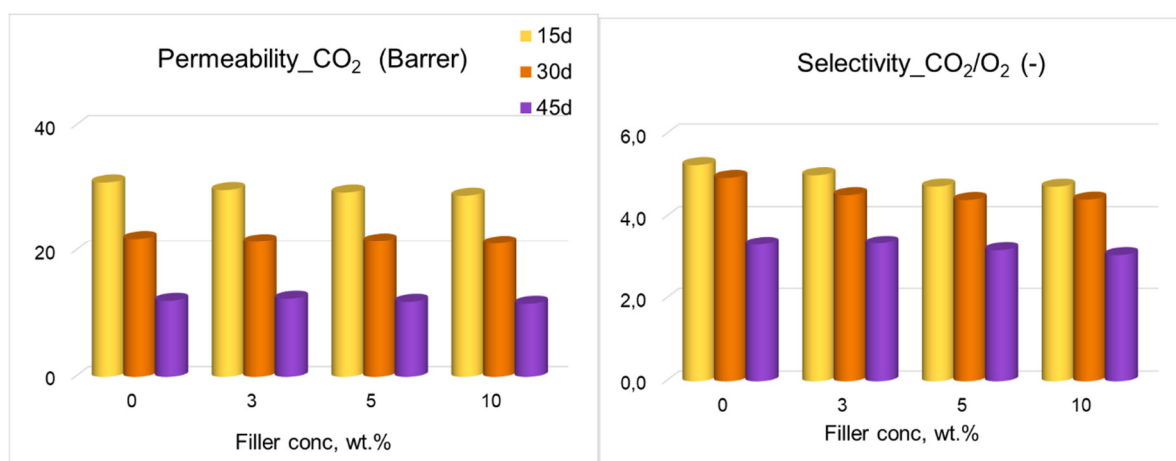

**Figure S.I. 10:** CO<sub>2</sub> Permeability and CO<sub>2</sub>/O<sub>2</sub> selectivity for the films based on EVA with increasing loadings of LDH and photo-exposed (15 d, 30 d and 45 d).

Table S.I.: 5 CO<sub>2</sub> Diffusion coefficient extracted from values in Figures 8

| Treatment time | LDH concentration, % | CO <sub>2</sub> Diffusion coefficient, 10 <sup>-12</sup> m <sup>2</sup> /s |
|----------------|----------------------|----------------------------------------------------------------------------|
| 0 days         | 0                    | 35.6                                                                       |
|                | 3                    | 32.1                                                                       |
|                | 5                    | 28.3                                                                       |
|                | 10                   | 17.1                                                                       |
| 15 days        | 0                    | 36.5                                                                       |
|                | 3                    | 32.8                                                                       |
|                | 5                    | 24.2                                                                       |
|                | 10                   | 16.8                                                                       |
| 30 days        | 0                    | 28.0                                                                       |
|                | 3                    | 28.6                                                                       |
|                | 5                    | 22.0                                                                       |
|                | 10                   | 12.6                                                                       |
